# Supplementary material for: Reliable Quantification of Protein Expression and Cellular Localization in Histological Sections
Source: PubMed Central journal article supplement (PMC4094387; doi:10.1371/journal.pone.0100822), 2014-07-11
Supplement: pone.0100822.s001.pdf [file pone.0100822.s001.pdf]

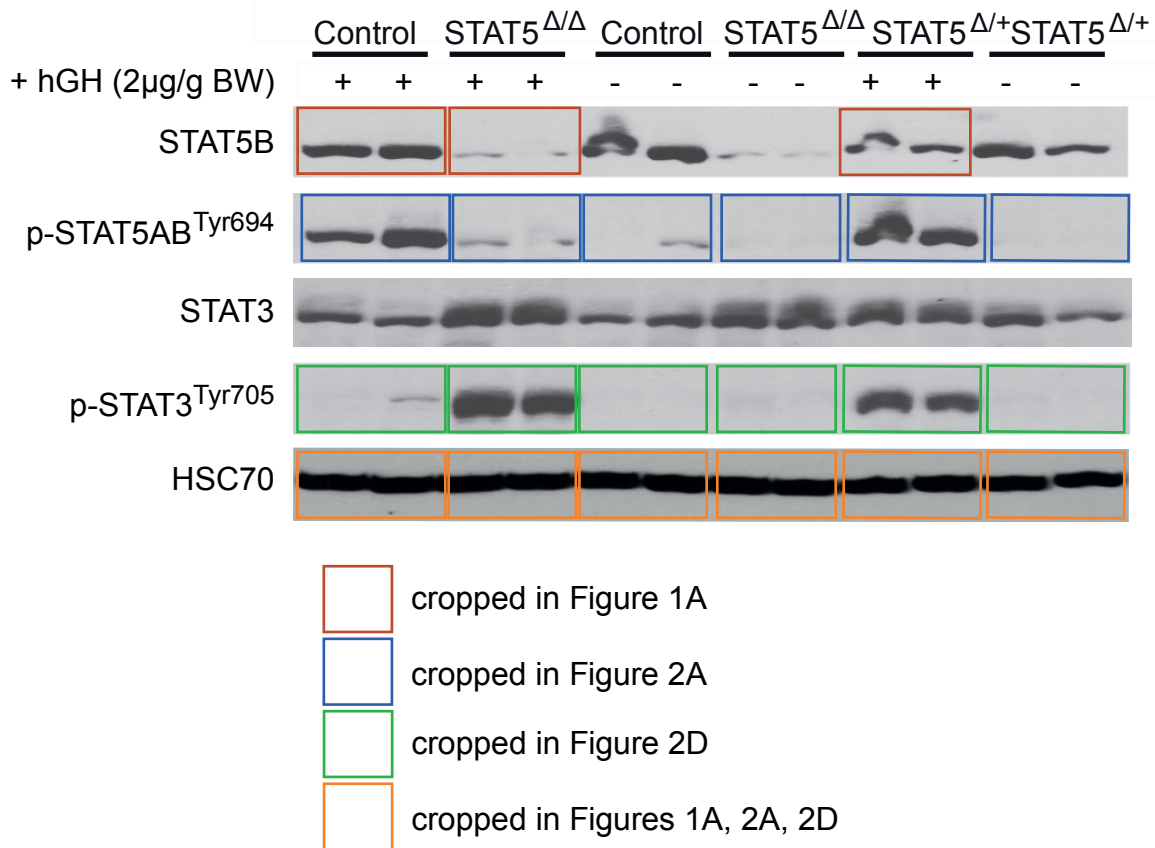

**Supplemental Figure S1.** *STAT5AB*, *p-STAT5<sup>Tyr694</sup>* and *p-STAT3<sup>Tyr705</sup>* protein expression in *Stat5ab<sup>+/+</sup>*, *Stat5ab<sup>+Δ</sup>* and *Stat5ab<sup>Δ/Δ</sup>* livers with and without GH treatment. Western blot depicting *STAT5AB*, *p-STAT5<sup>Tyr694</sup>* and *p-STAT3<sup>Tyr705</sup>* expression in *Stat5ab<sup>+/+</sup>* (n=2), *Stat5ab<sup>+Δ</sup>* (n=2) and *Stat5ab<sup>Δ/Δ</sup>* (n=2) livers with and without GH treatment.

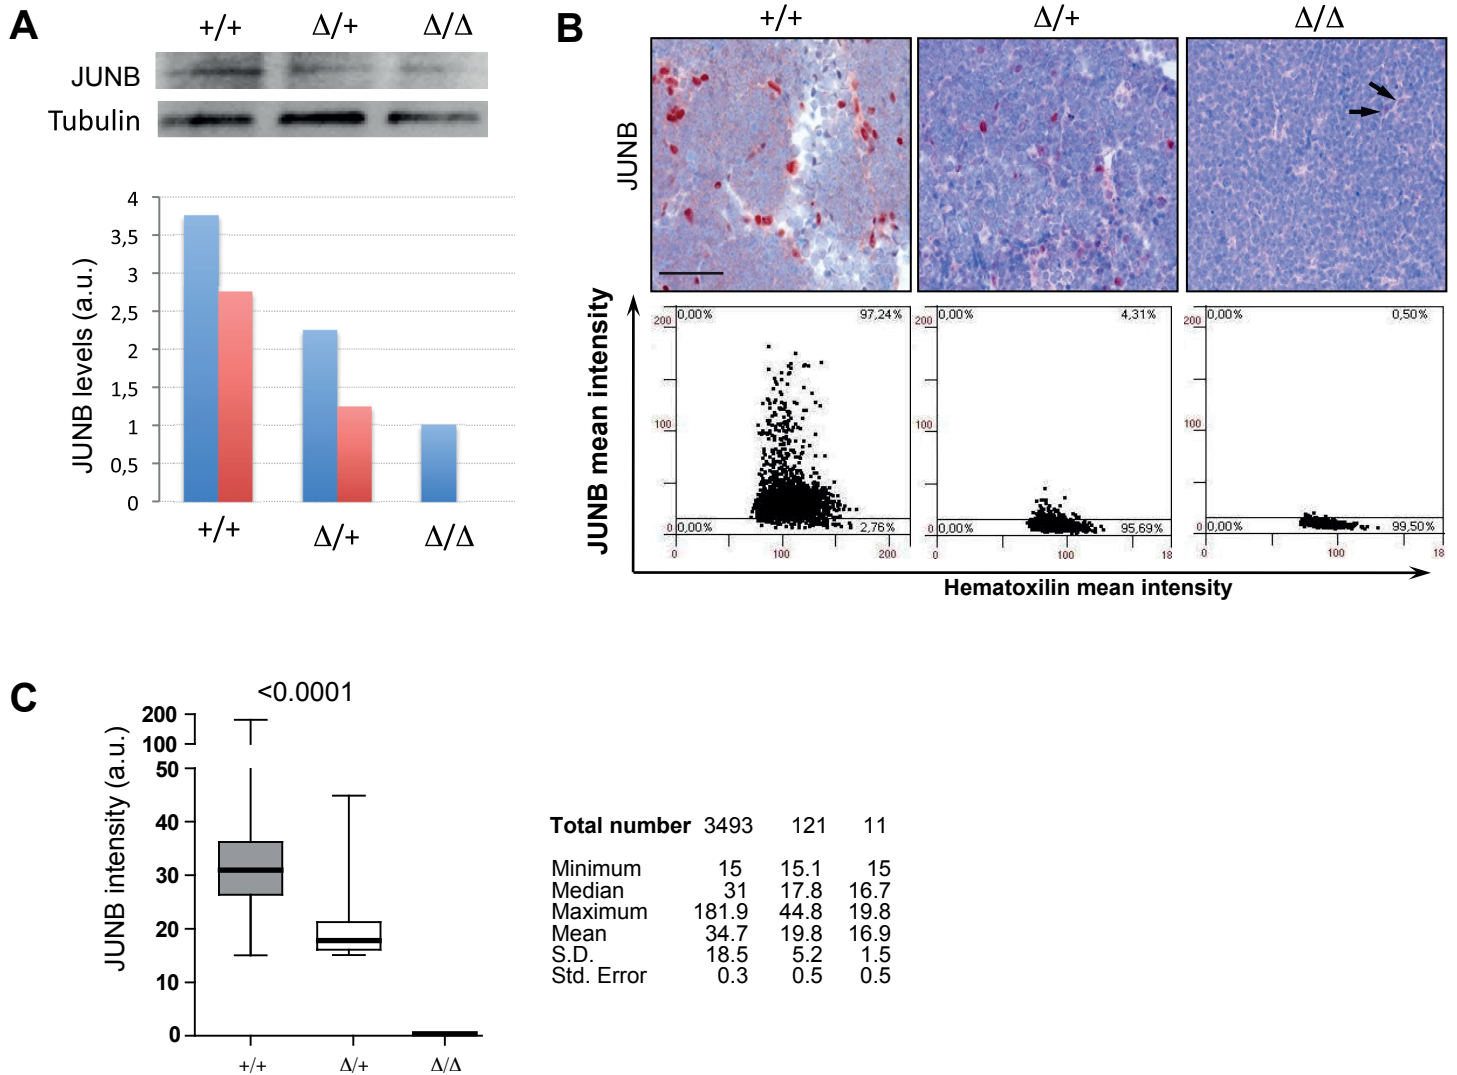

**Supplemental Figure S2. Determination of JUNB protein levels in T cell lymphomas. A** Western blot of JunB expression in  $JunB^{+/+}$ ,  $JunB^{+/\Delta}$  and  $JunB^{\Delta/\Delta}$  T-cell lymphomas. **B** T-cell lymphomas stained by IHC for JUNB. JUNB positive cells are stained in red (AEC). Nuclei are counterstained with hematoxylin. Scattergrams show the results from the analysis with HistoQuest™. The background levels were determined in  $JunB^{\Delta/\Delta}$  tumors and the cut-off was set at 15 mean intensity units. **C** Whisker-box blot from the data generated in (B). The box indicates the interquartile range; the horizontal line in the box depicts the median; whiskers indicate the data range. 3592  $JunB^{+/+}$  cells, 2805  $JunB^{+/\Delta}$  cells and 2208  $JunB^{\Delta/\Delta}$  cells were analyzed in total. One-way ANOVA testing proved that the measured differences were of high significance ( $p < 0.0001$ ).

**A**

| Scoring | Mean intensity range |
|---------|----------------------|
| 0       | (0<MI≤15)            |
| 1       | (15<MI≤30)           |
| 2       | (30<MI≤45)           |
| 3       | (45>MI)              |

**B**

|    | HistoQuest (MI) | HistoQuest (scoring) | Pathologist 1 (first evaluation) | Pathologist 1 (re-evaluation) | Pathologist 2 (first evaluation) | Pathologist 2 (re-evaluation) |
|----|-----------------|----------------------|----------------------------------|-------------------------------|----------------------------------|-------------------------------|
| 1  | 49.86           | 3                    | 3                                | 3                             | 2                                | 2                             |
| 2  | 33.71           | 2                    | 3                                | 3                             | 2                                | 2                             |
| 3  | 35.42           | 2                    | 3                                | 3                             | 2                                | 2                             |
| 4  | 38.99           | 2                    | 3                                | 3                             | 2                                | 2                             |
| 5  | 28.06           | 1                    | 2                                | 2                             | 2                                | 2                             |
| 6  | 44.79           | 2                    | 3                                | 2                             | 2                                | 2                             |
| 7  | 40.86           | 2                    | 3                                | 3                             | 2                                | 2                             |
| 8  | 35.09           | 2                    | 3                                | 2                             | 1                                | 2                             |
| 9  | 36.50           | 2                    | 3                                | 3                             | 1                                | 2                             |
| 10 | 41.05           | 2                    | 2                                | 2                             | 1                                | 2                             |
| 11 | 44.58           | 2                    | 3                                | 3                             | 3                                | 2                             |
| 12 | 38.97           | 2                    | 3                                | 2                             | 1                                | 2                             |
| 13 | 41.03           | 2                    | 3                                | 3                             | 1                                | 2                             |
| 14 | 62.75           | 3                    | 3                                | 3                             | 3                                | 3                             |
| 15 | 52.19           | 3                    | 3                                | 3                             | 2                                | 3                             |
| 16 | 45.26           | 3                    | 3                                | 3                             | 2                                | 3                             |
| 17 | 34.20           | 2                    | 2                                | 2                             | 2                                | 2                             |
| 18 | 56.24           | 3                    | 3                                | 3                             | 3                                | 3                             |
| 19 | 5.05            | 0                    | 0                                | 0                             | 0                                | 0                             |
| 20 | 52.50           | 3                    | 3                                | 3                             | 2                                | 3                             |
| 21 | 56.19           | 3                    | 3                                | 3                             | 3                                | 3                             |
| 22 | 35.49           | 2                    | 3                                | 2                             | 2                                | 2                             |

**C**

| matches       | First evaluation |               | Re-evaluation |               |
|---------------|------------------|---------------|---------------|---------------|
|               | Pathologist 1    | Pathologist 2 | Pathologist 1 | Pathologist 2 |
| Pathologist 1 |                  | 7/22          |               | 14/22         |
| Pathologist 2 | 7/22             |               | 14/22         |               |
| HistoQuest    | 10/22            | 11/22         | 14/22         | 20/22         |

**Supplemental Figure S3. Scoring of nuclear STAT5AB in human HCC samples by two pathologists and the image analysis software. A** Matrix for the conversion of the mean intensity (MI) values obtained from image analysis into the scoring values 0, 1, 2 and 3. **B** Evaluation of 22 human HCC samples for nuclear STAT5AB intensity based on the 0, 1, 2, 3 scoring system. The detected nuclear mean intensities (MI) of HistoQuest™ are listed. The scorings of the two pathologists are displayed before and after software-assisted re-evaluation. Revised scoring values compared to the first evaluation are labeled in red. **C** Numbers of scoring matches in the collective of 22 HCC samples between the pathologists and HistoQuest™ software are depicted.

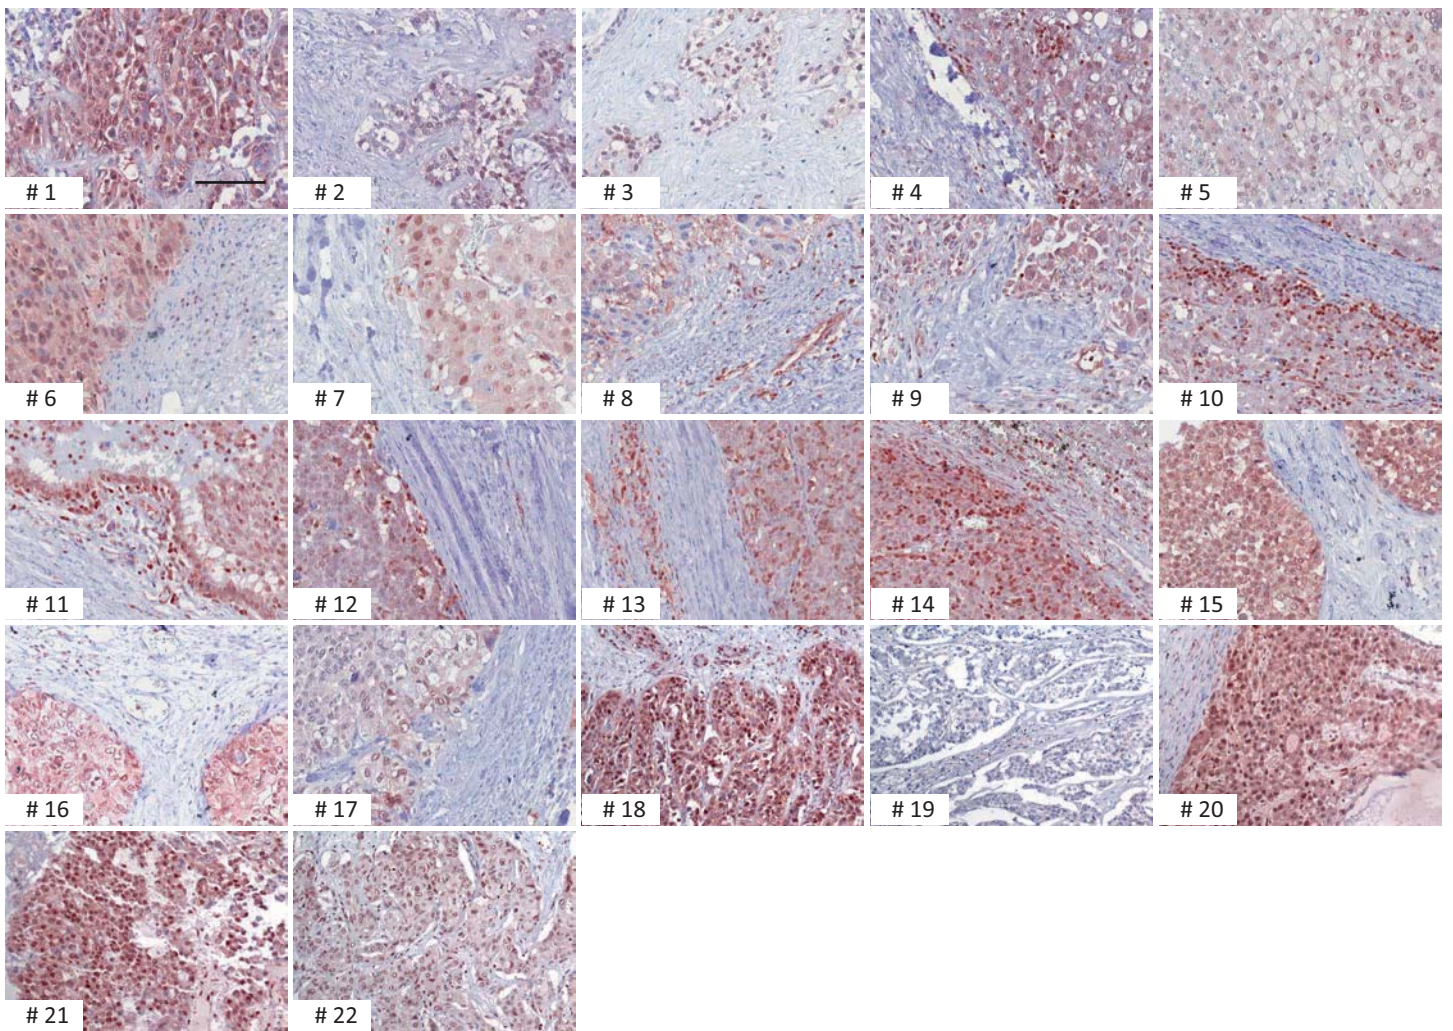

**Supplemental Figure S4.** *STAT5AB IHC on human HCC specimens used for the evaluation study.* Representative microscopic pictures of 22 human HCC samples, which were stained for STAT5AB expression by IHC to evaluate nuclear STAT5AB levels.
